# Supplementary material
Source: PubMed Central journal article supplement (PMC5660509)
Supplement: NIHMS875013-supplement-supplement_1.pdf [file NIHMS875013-supplement-supplement_1.pdf]

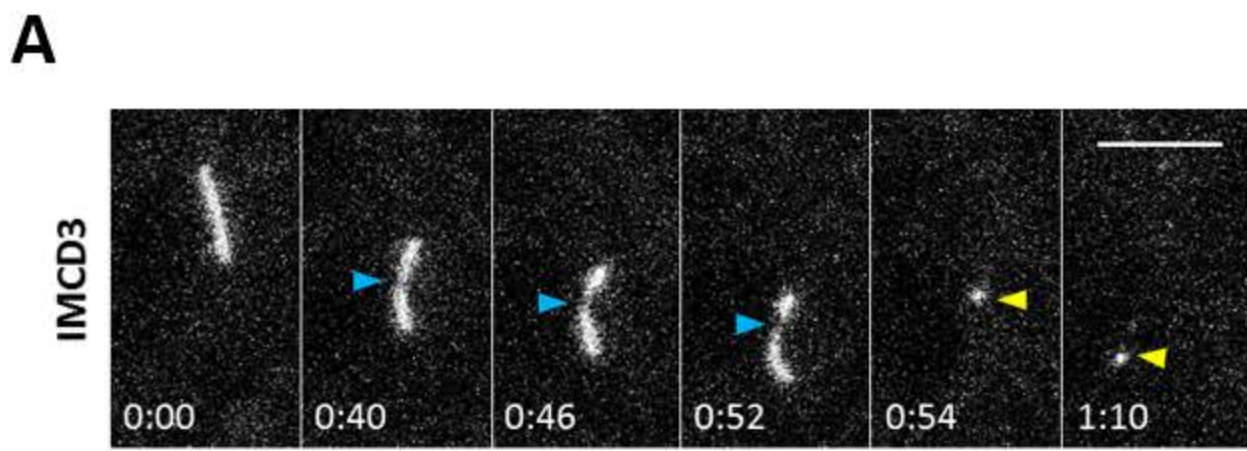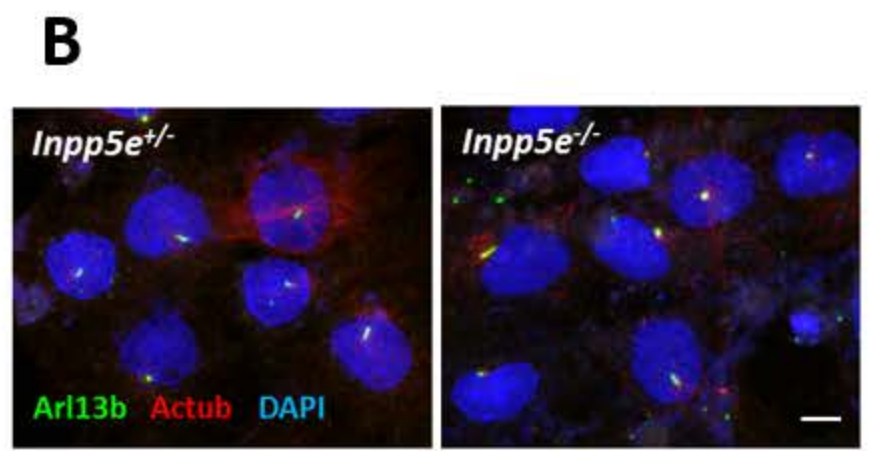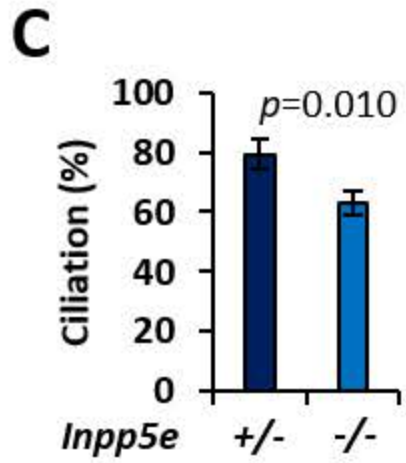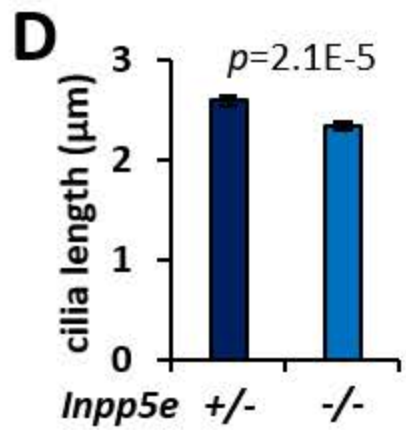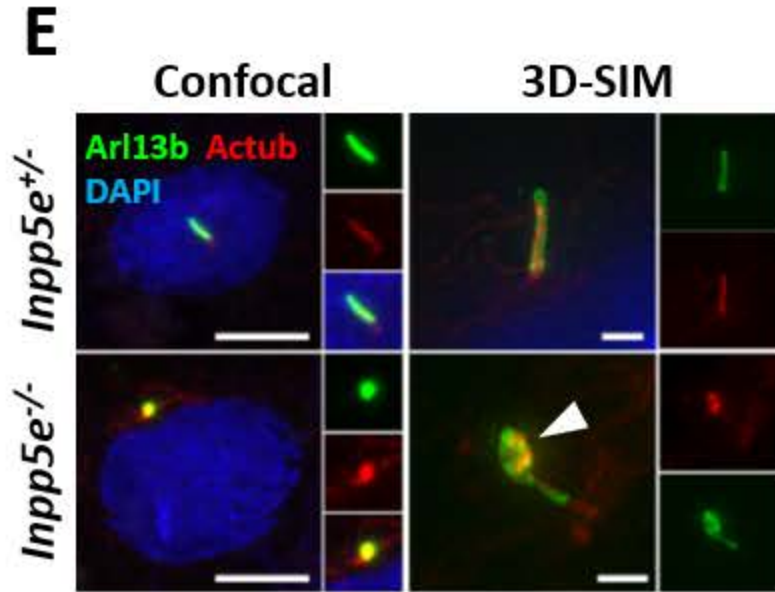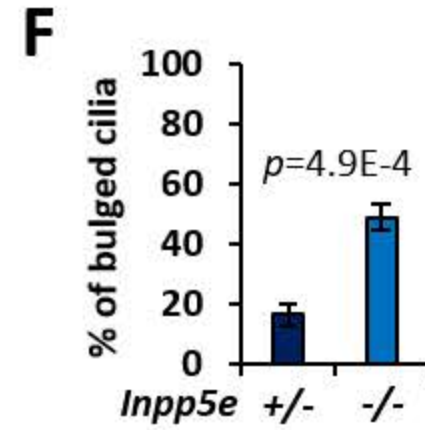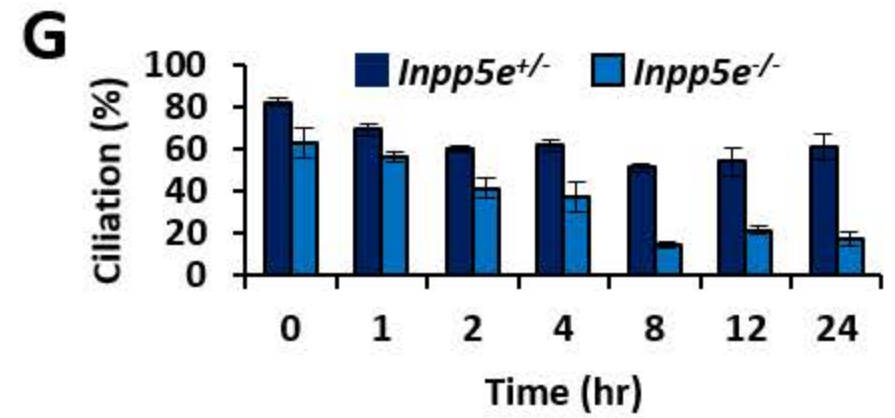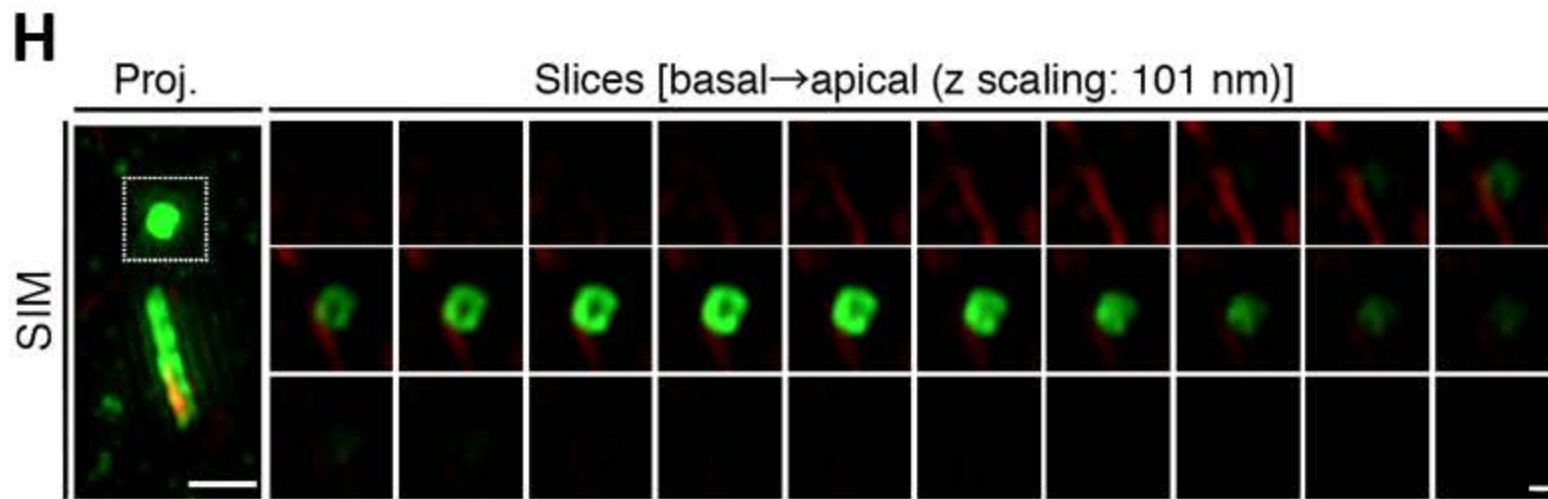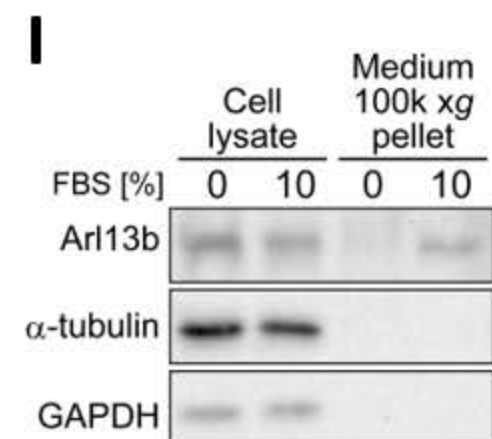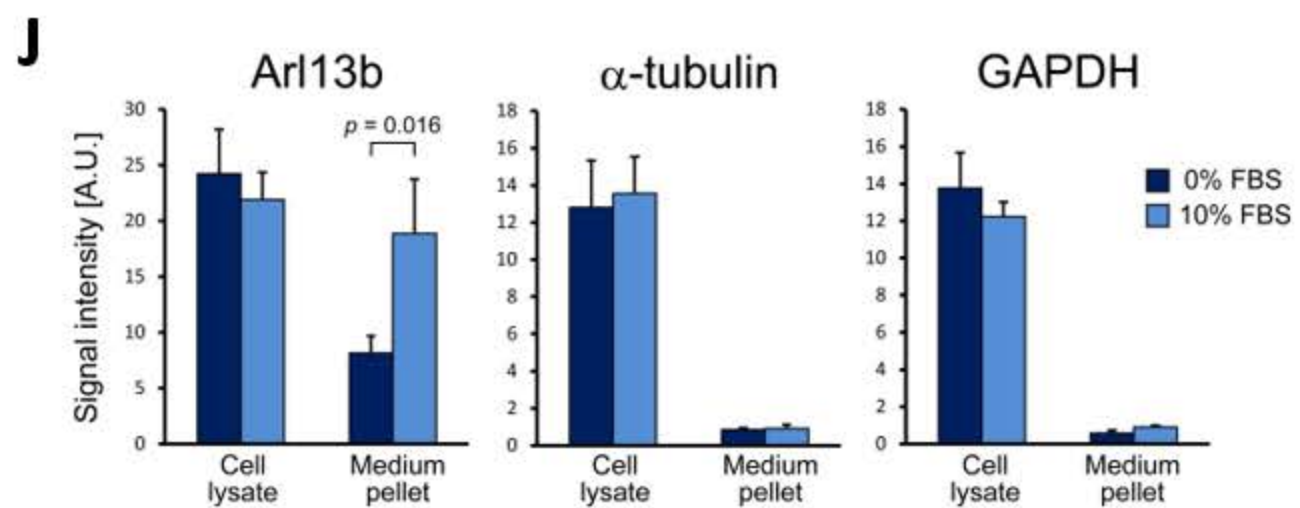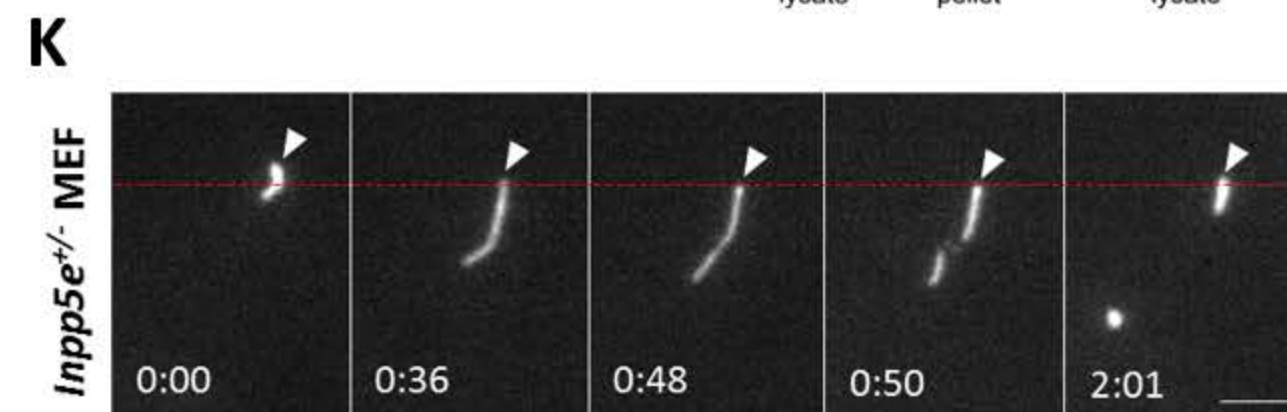



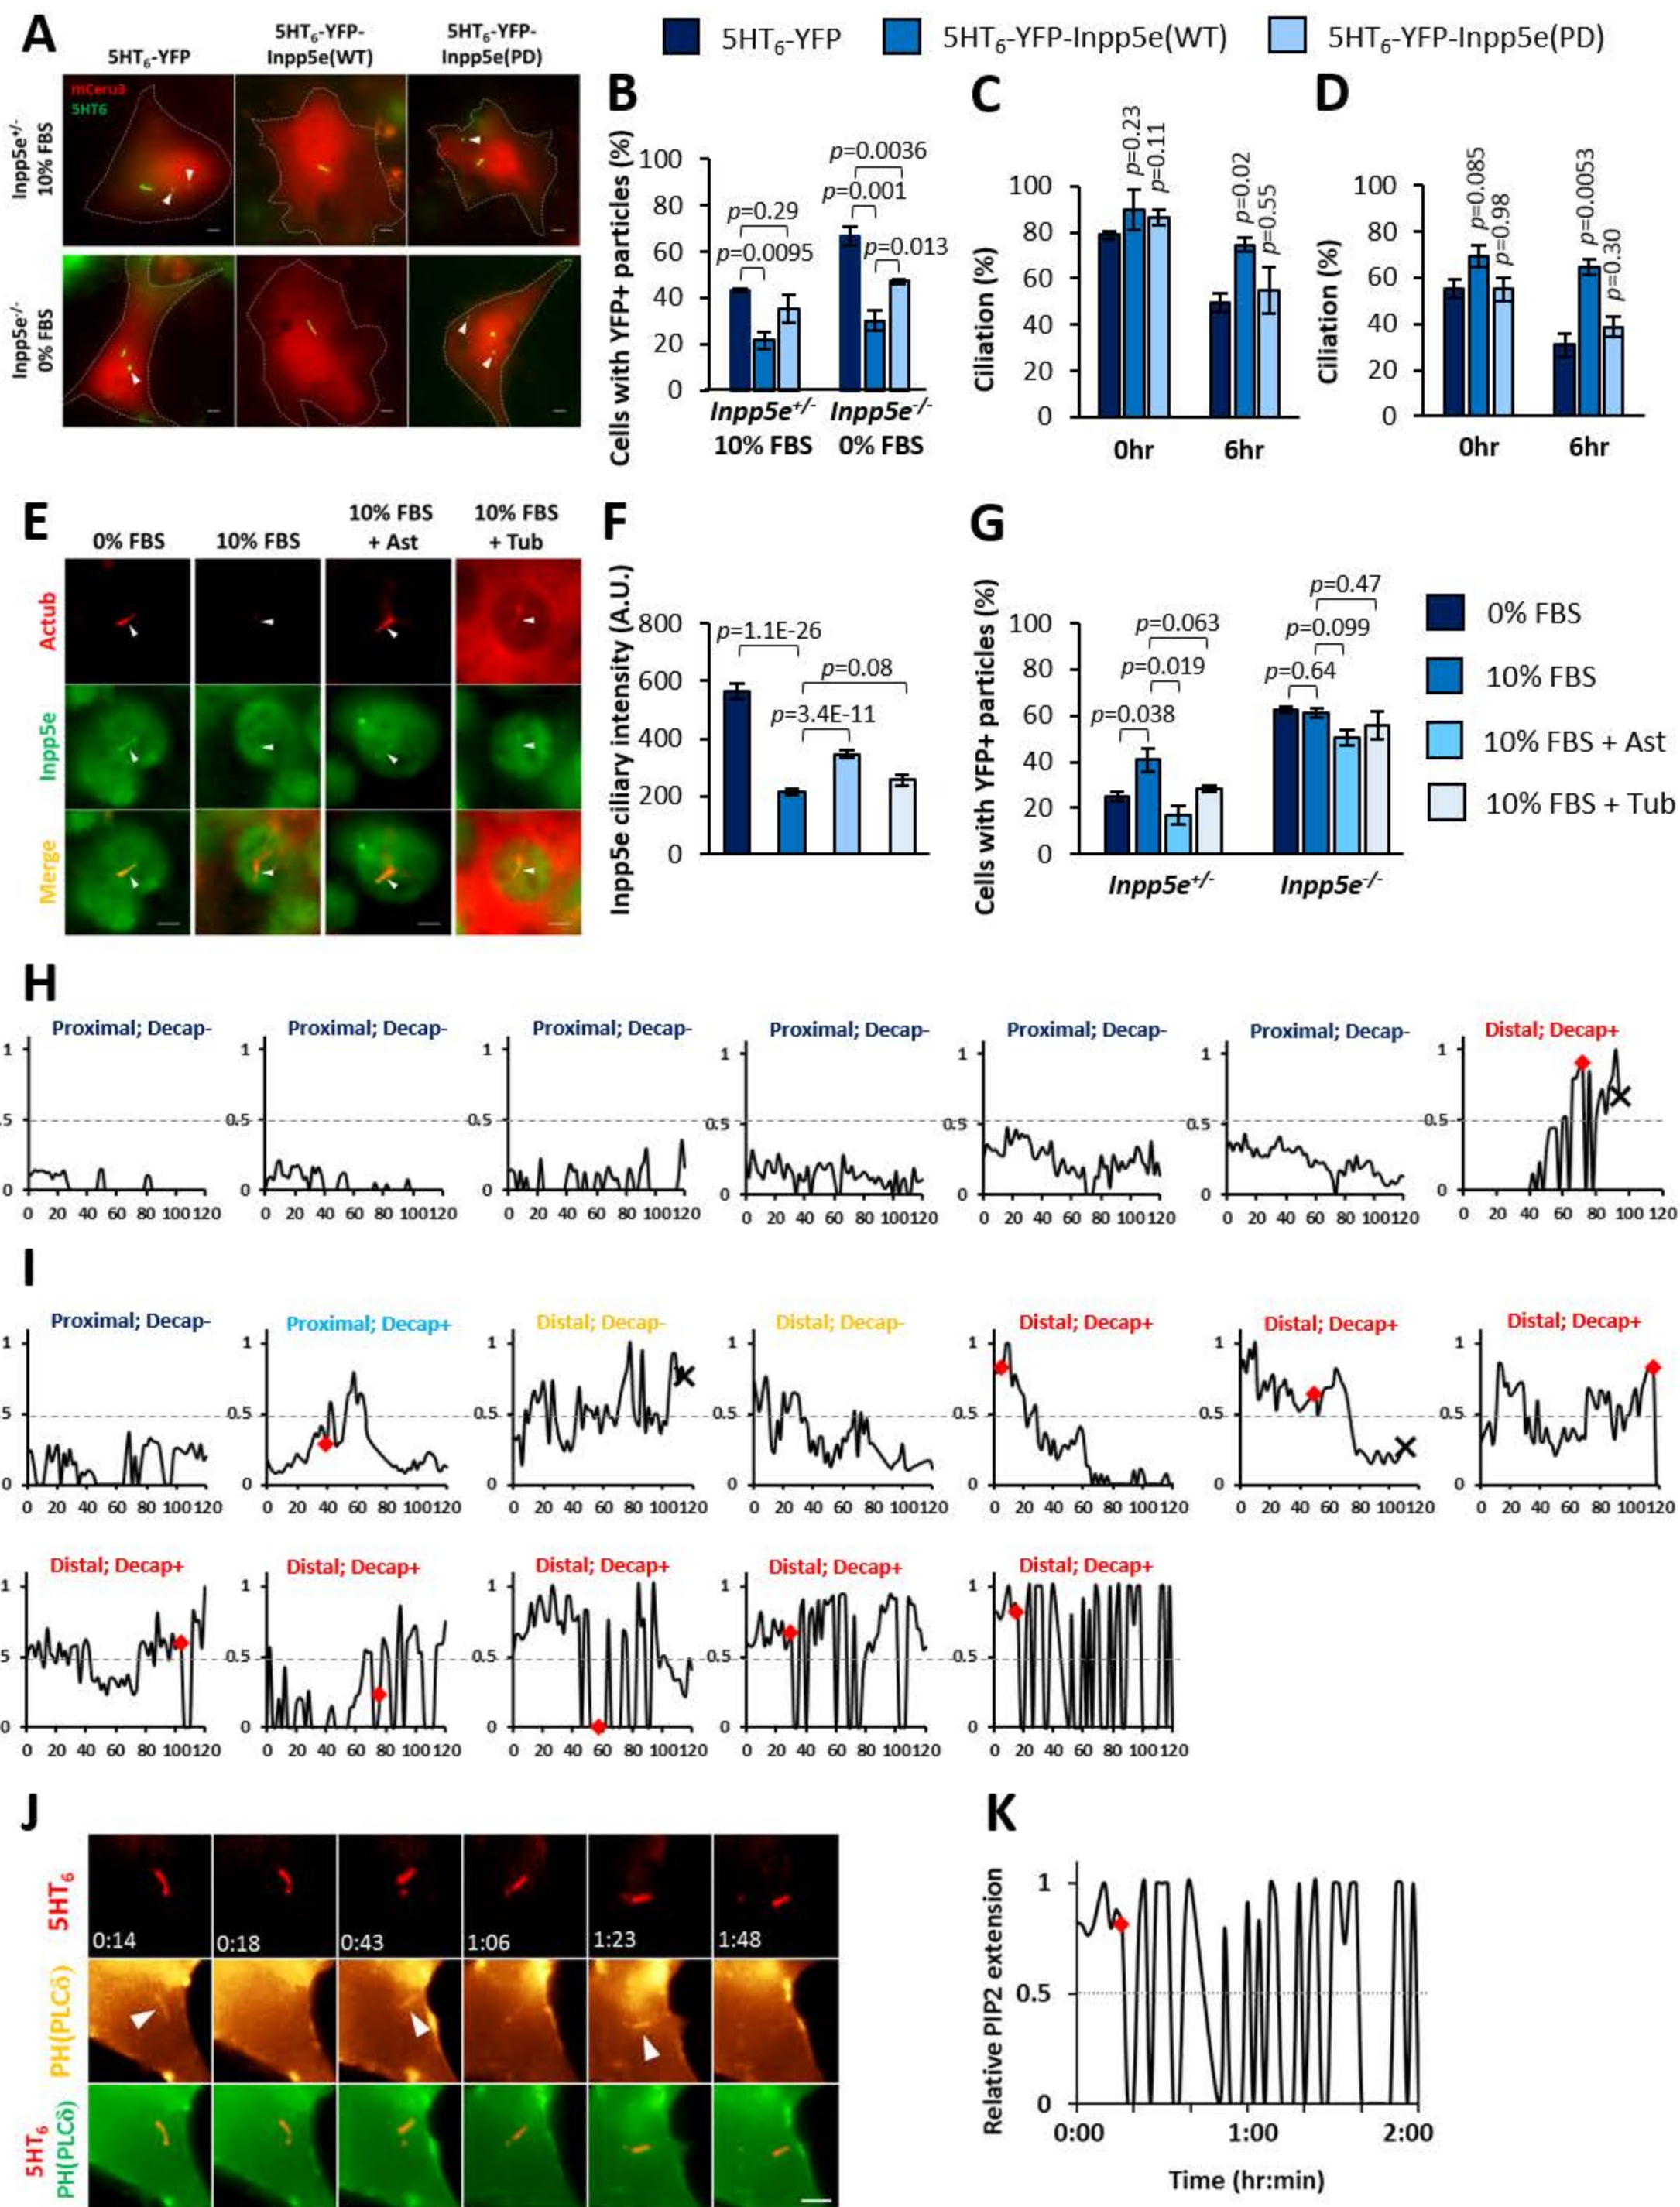



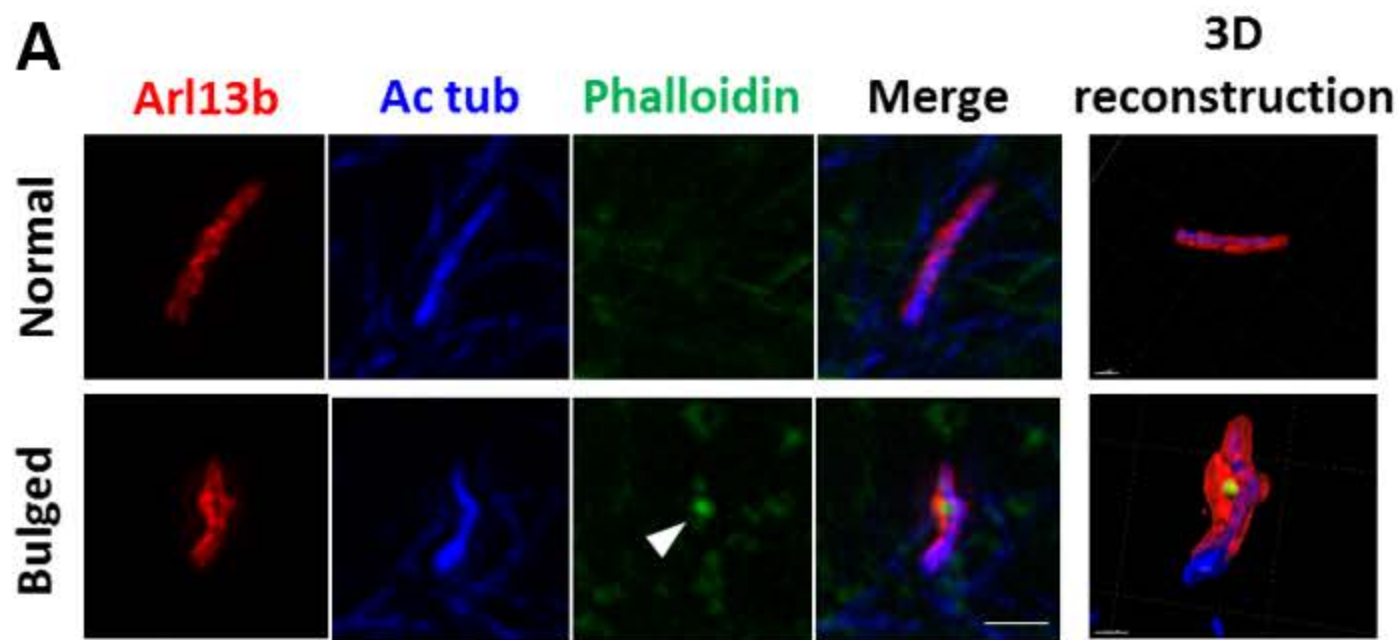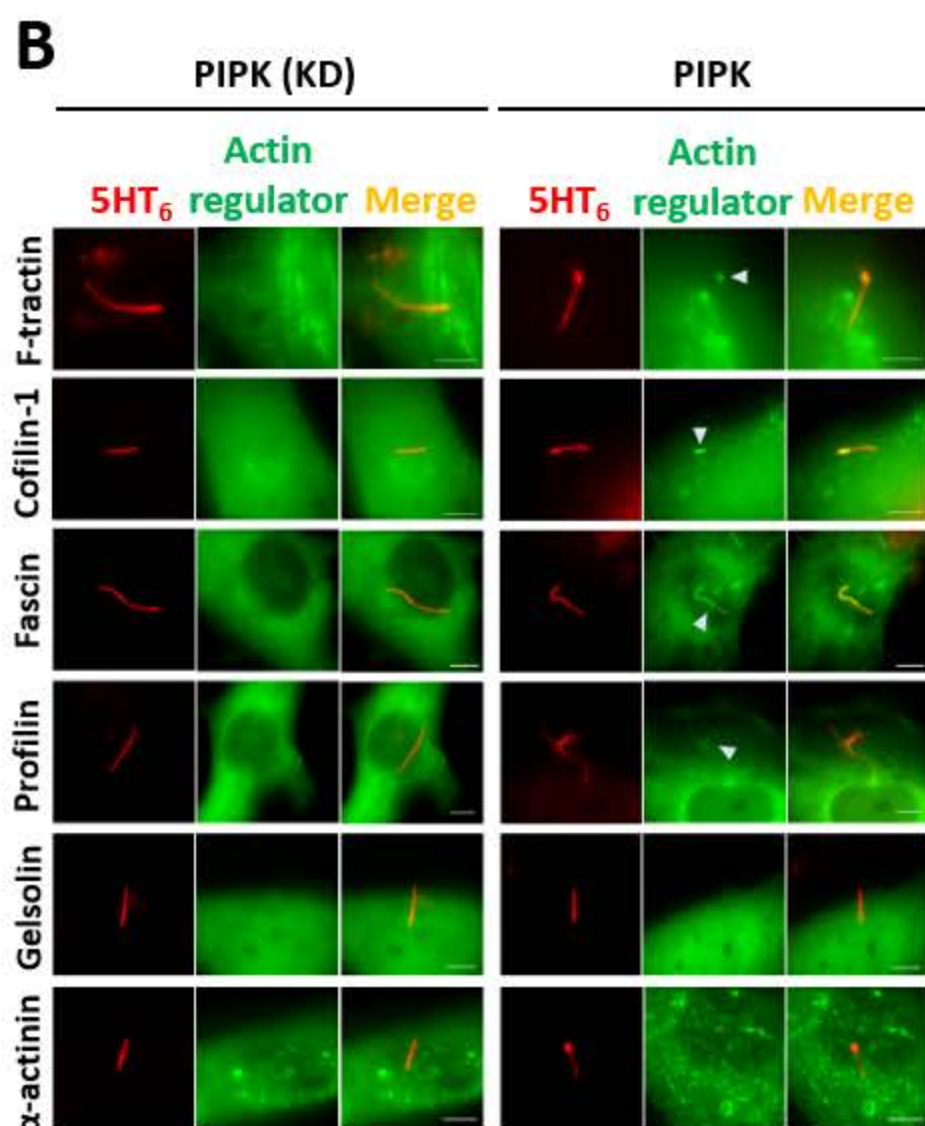

**C**

| Condition | N   | Probability | Relative risk | 95% C.I     | <i>p</i> |
|-----------|-----|-------------|---------------|-------------|----------|
| PIPK (KD) | 38  | 0           | 15.44         | 0.93-257.01 | 0.056    |
| PIPK      | 47  | 0.19        |               |             |          |
| PIPK (KD) | 48  | 0           | 33.25         | 2.01-549.91 | 0.014    |
| PIPK      | 27  | 0.33        |               |             |          |
| PIPK (KD) | 122 | 0.016       | 17.82         | 4.34-73.14  | 0.0001   |
| PIPK      | 89  | 0.29        |               |             |          |
| PIPK (KD) | 38  | 0.053       | 2.65          | 0.57-12.36  | 0.21     |
| PIPK      | 43  | 0.14        |               |             |          |
| PIPK (KD) | 63  | 0.032       | 1.086         | 0.16-7.46   | 0.93     |
| PIPK      | 58  | 0.034       |               |             |          |
| PIPK (KD) | 13  | 0.077       | 1.00          | 0.10-10.038 | 1.00     |
| PIPK      | 26  | 0.077       |               |             |          |

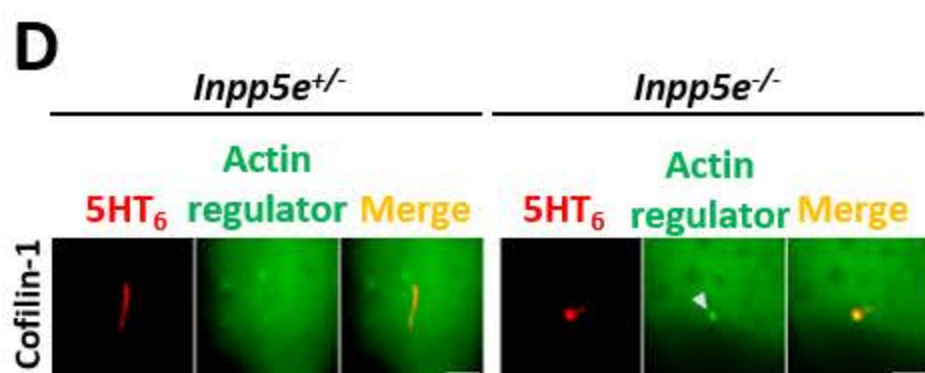

**E**

| Condition                    | N  | Probability | Relative risk | 95% C.I     | <i>p</i> |
|------------------------------|----|-------------|---------------|-------------|----------|
| <i>Inpp5e</i> <sup>+/-</sup> | 26 | 0           | 15.30         | 0.93-252.72 | 0.057    |
| <i>Inpp5e</i> <sup>-/-</sup> | 29 | 0.28        |               |             |          |

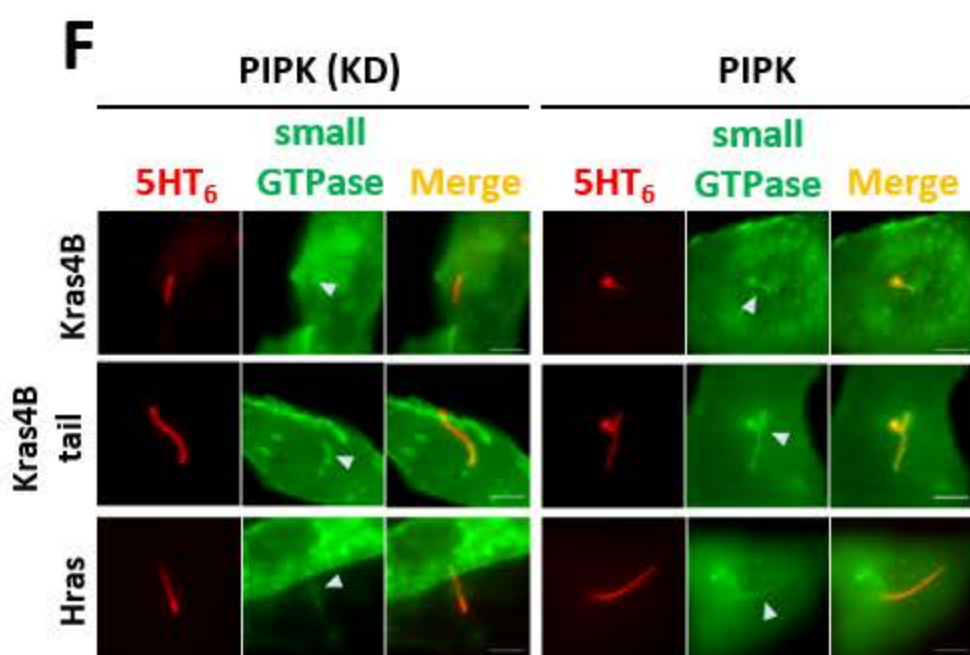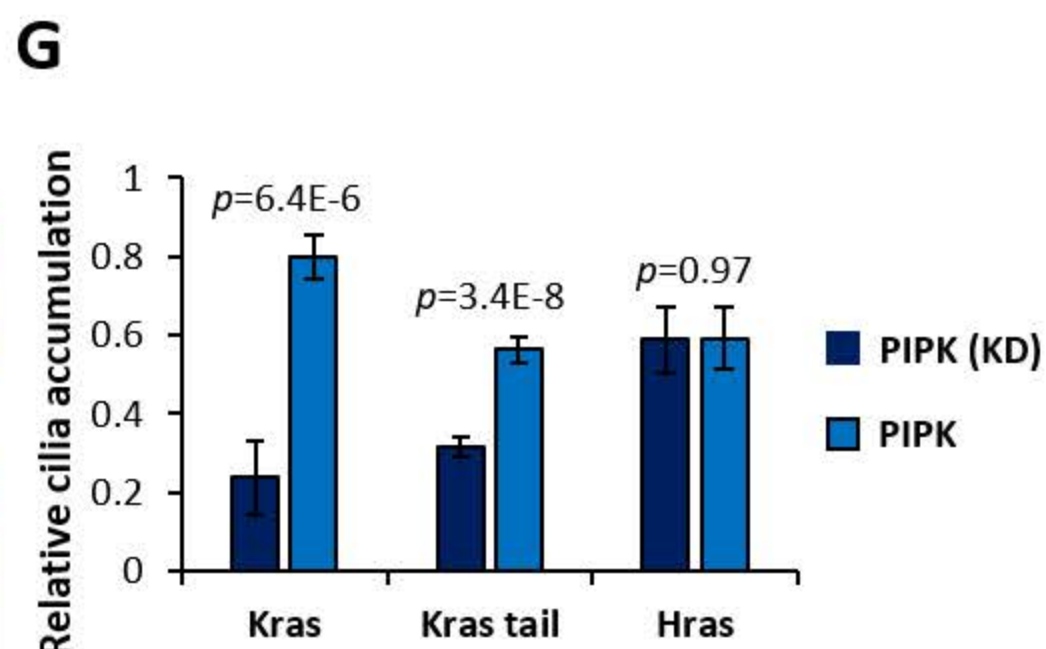



■ *Inpp5e*<sup>-/-</sup> 0% FBS    ■ *Inpp5e*<sup>+/-</sup> 10% FBS    ■ *Inpp5e*<sup>-/-</sup> 10% FBS

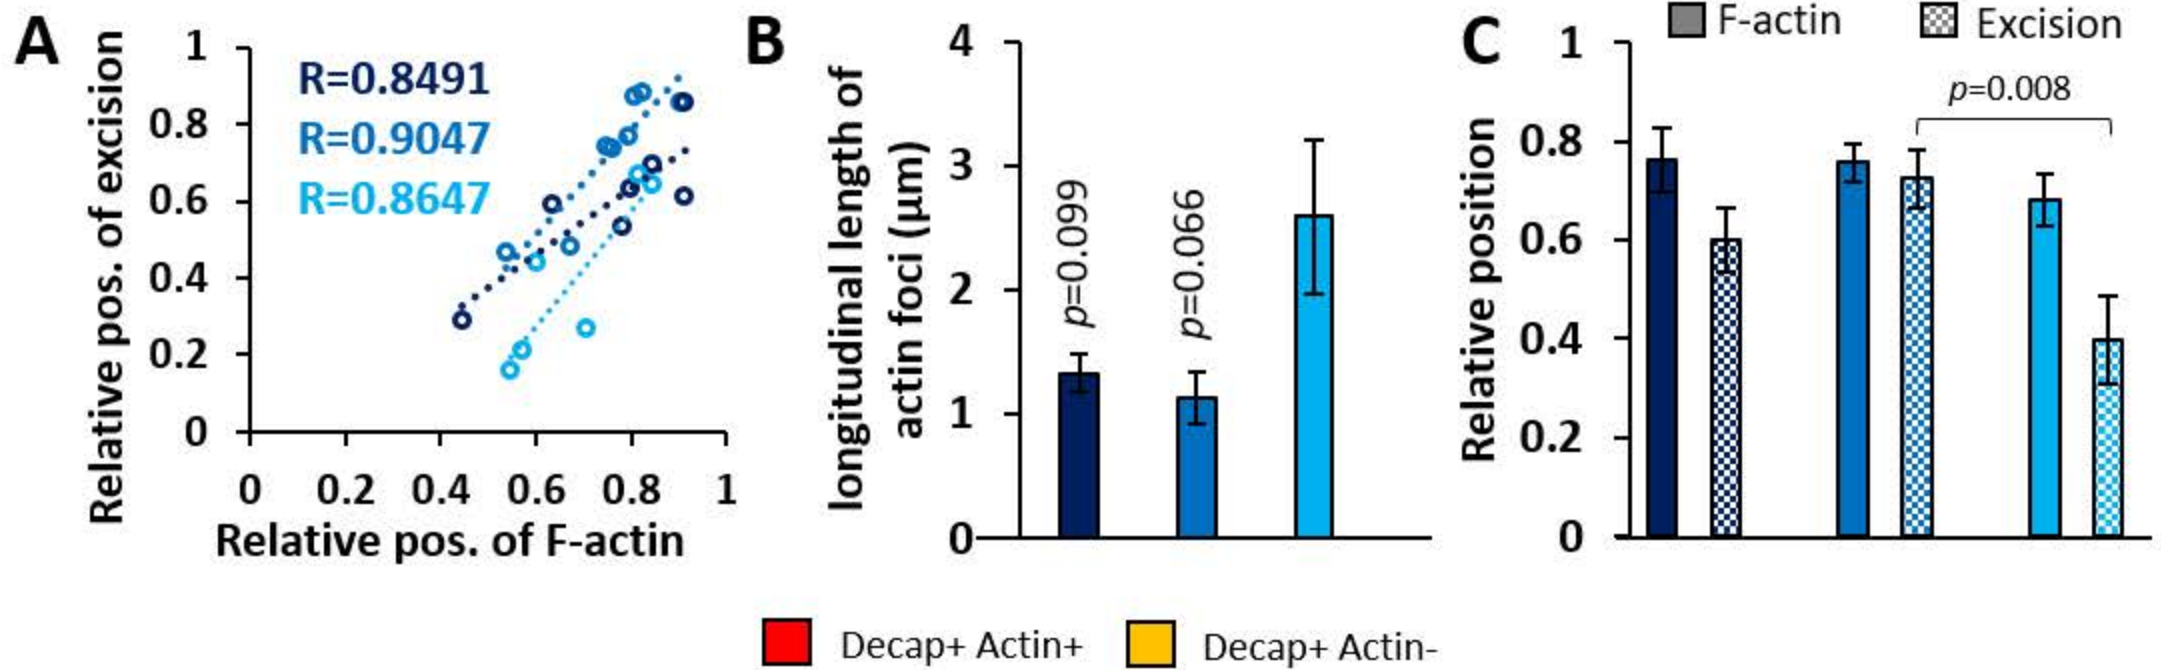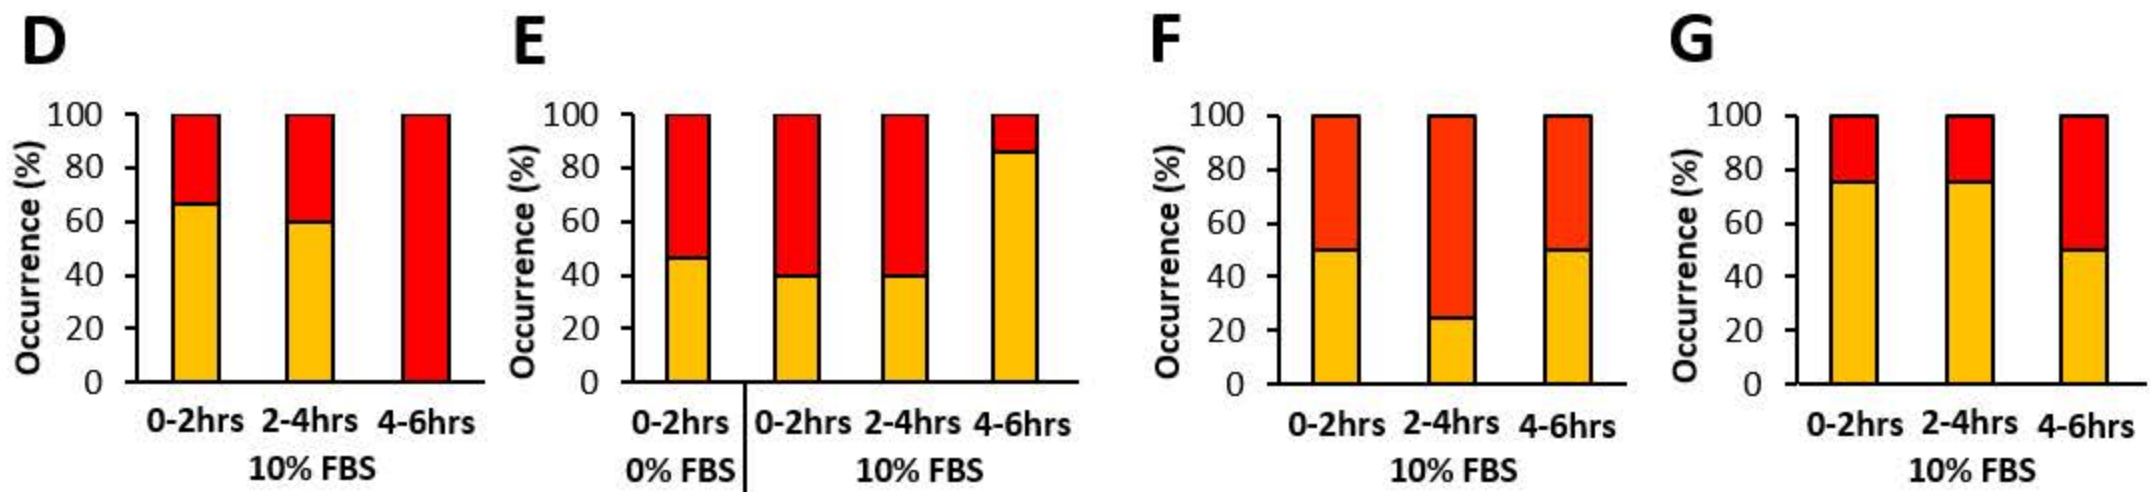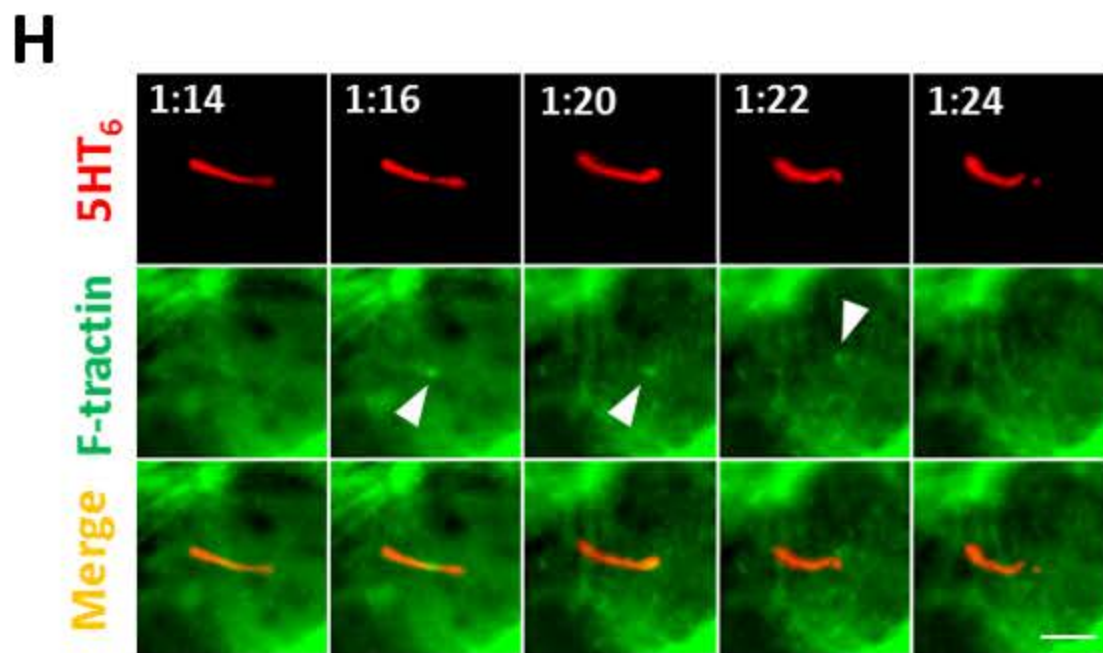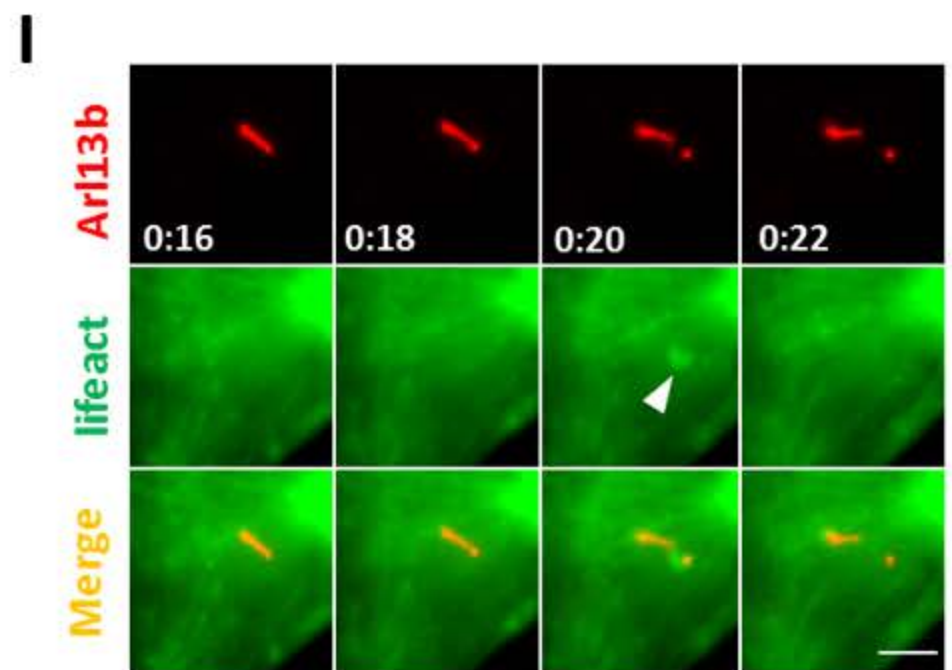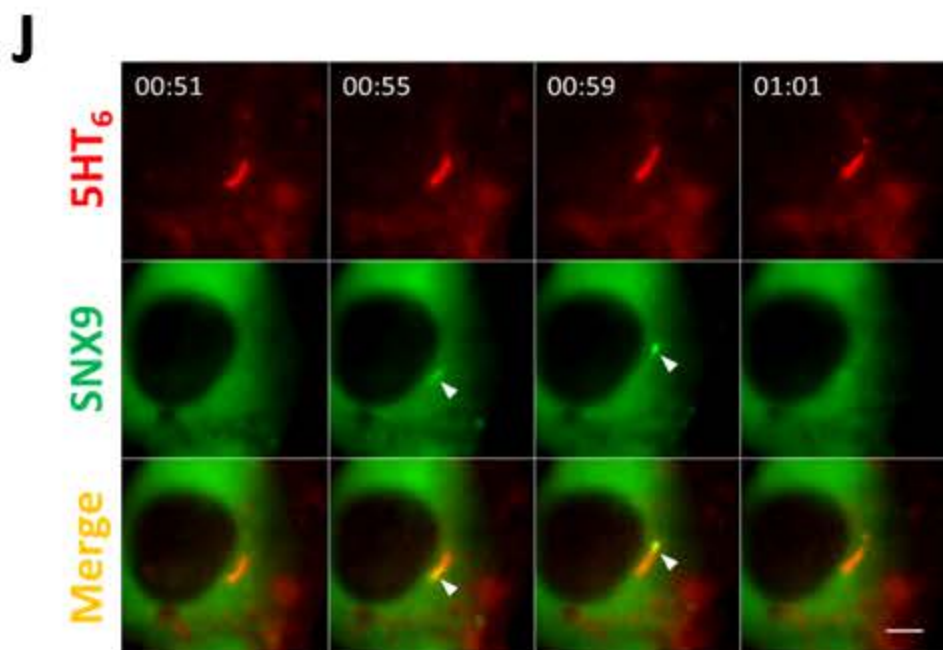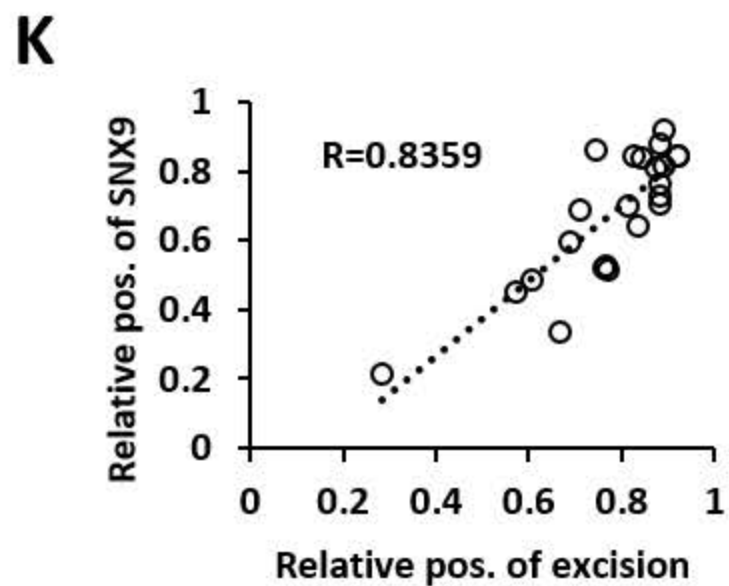



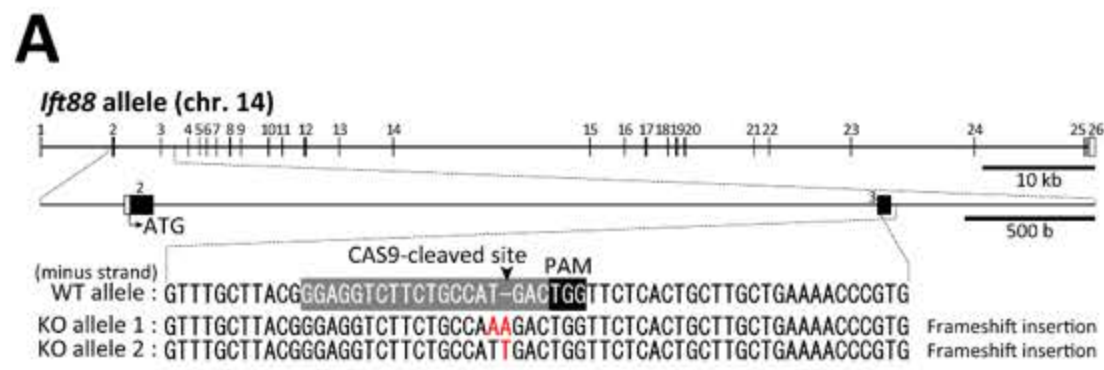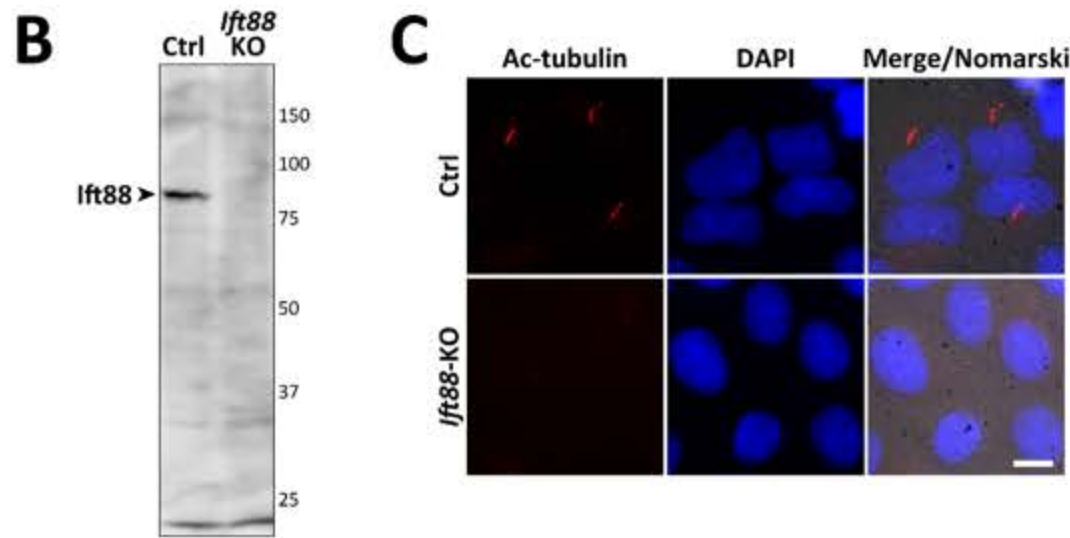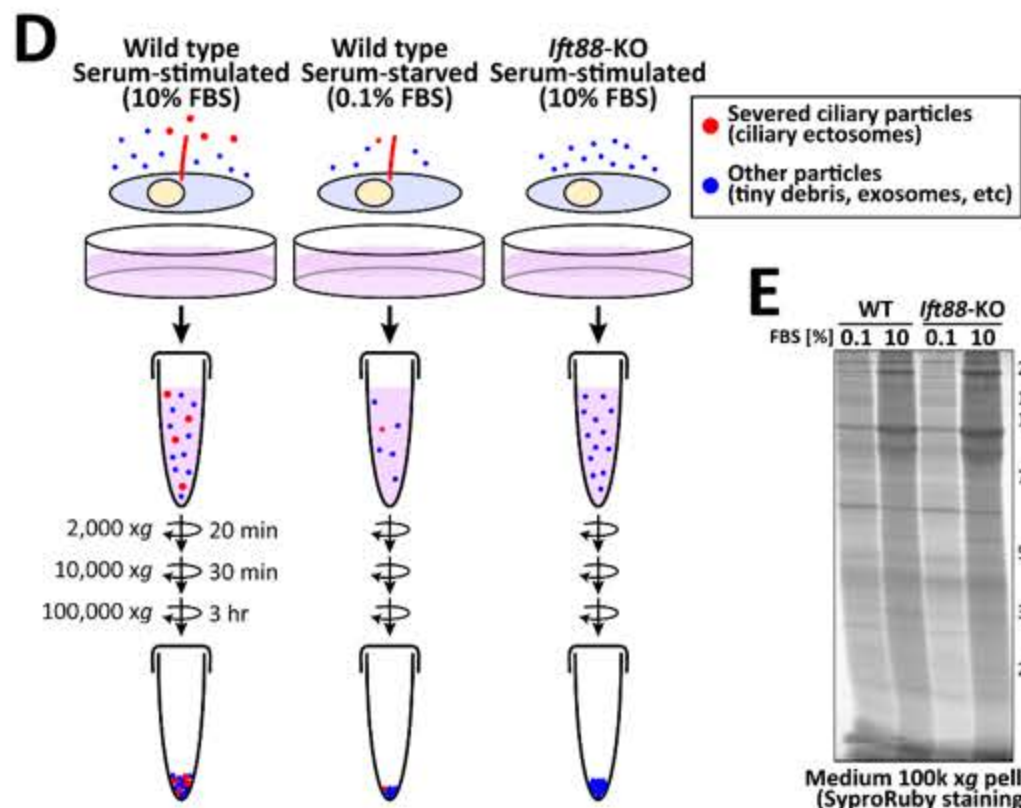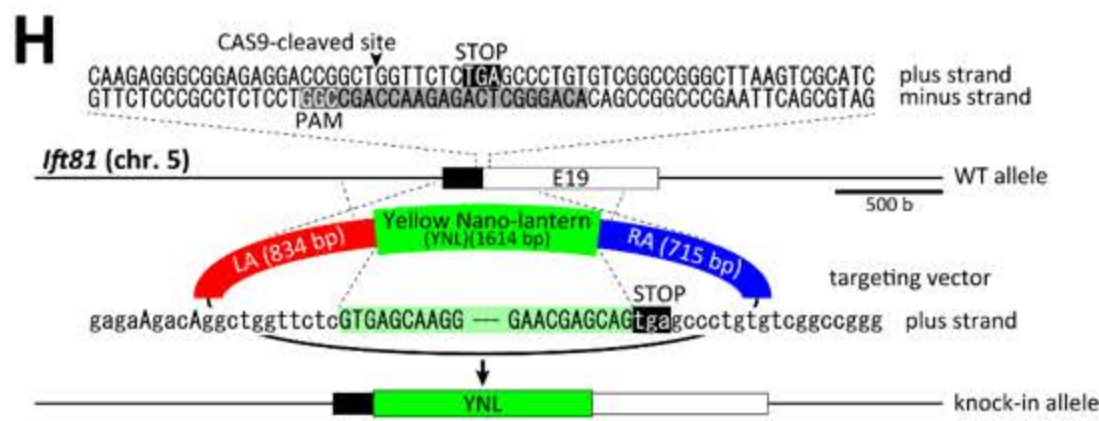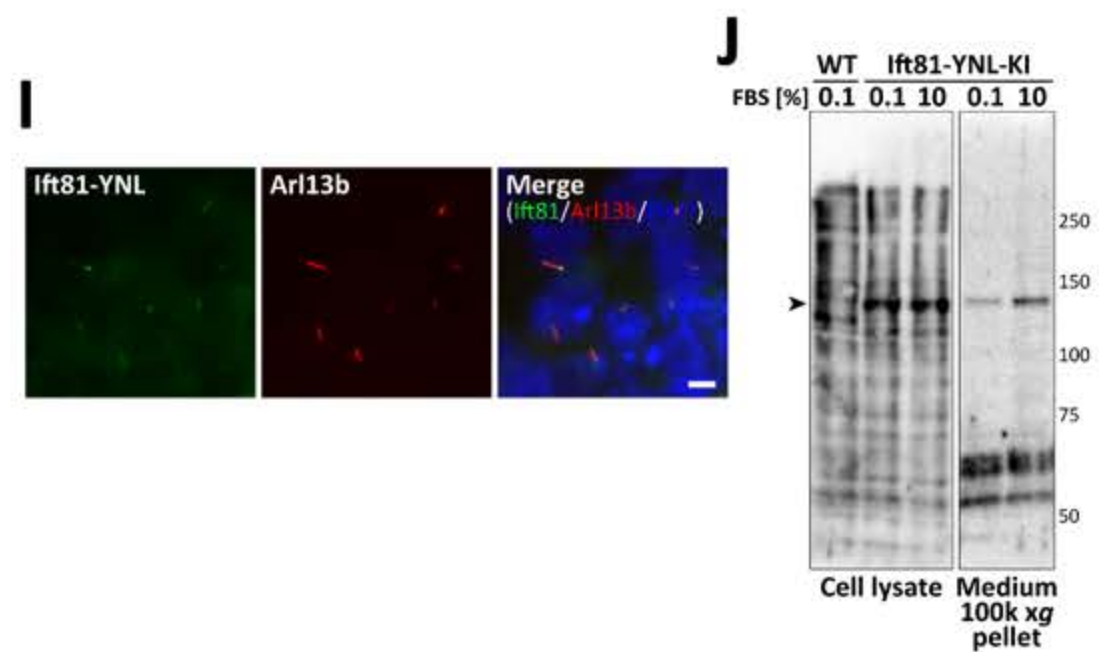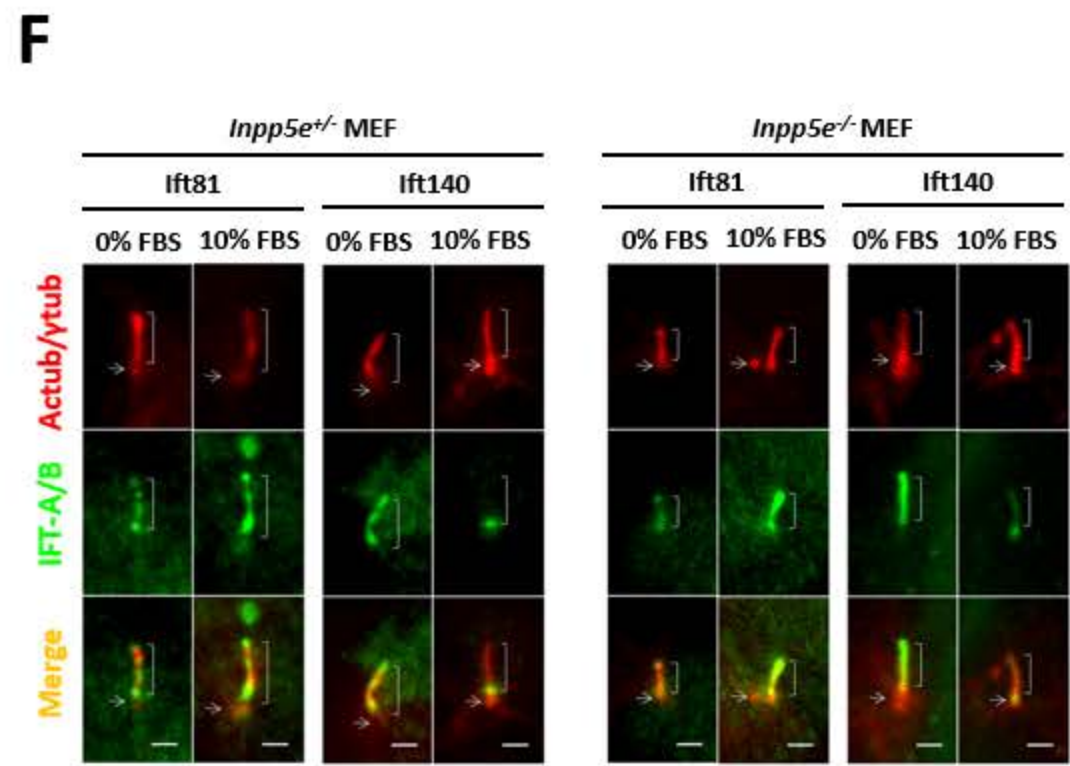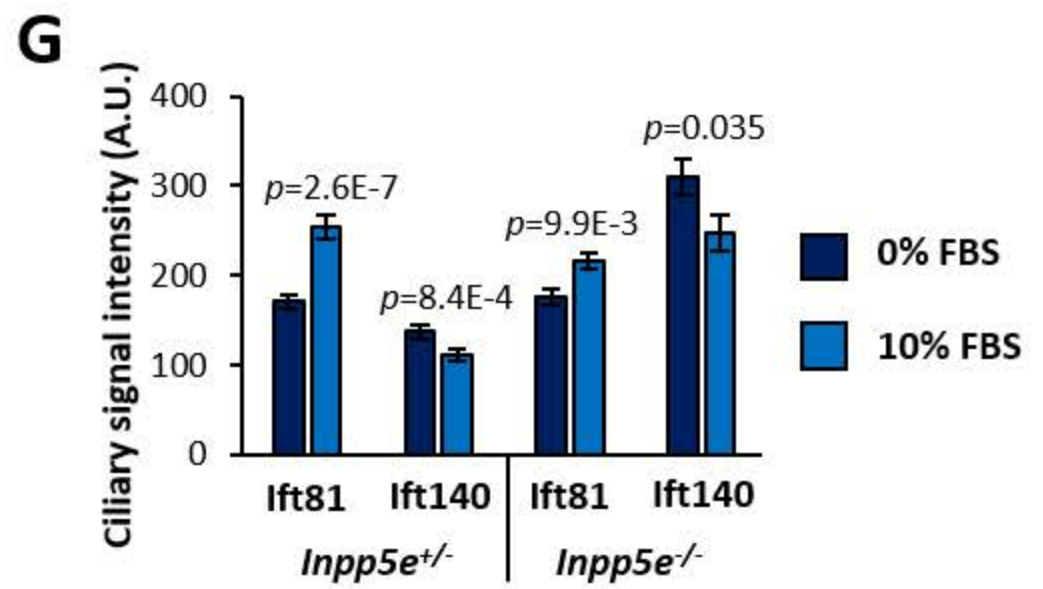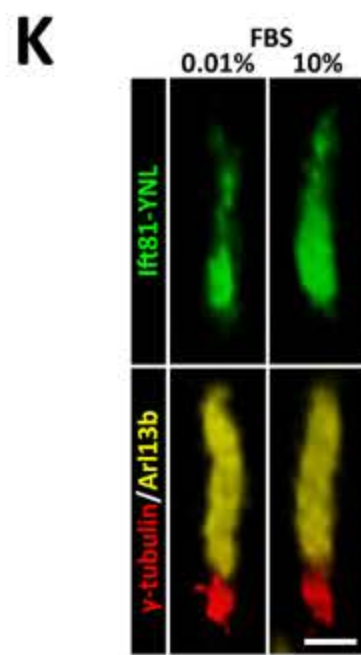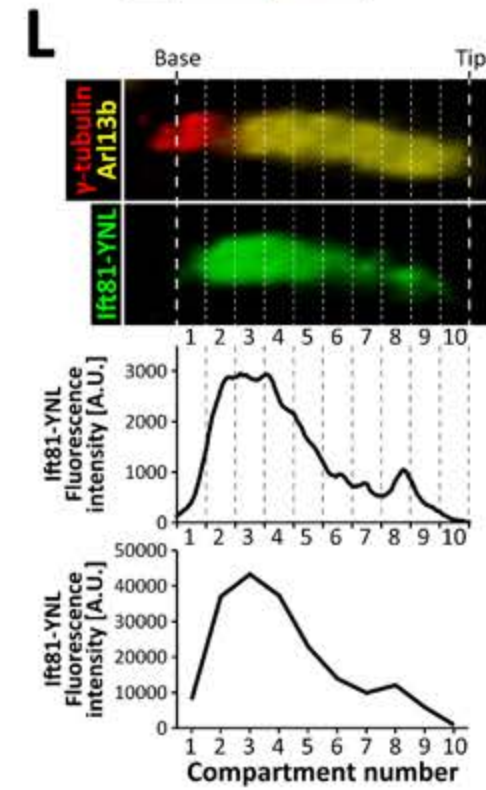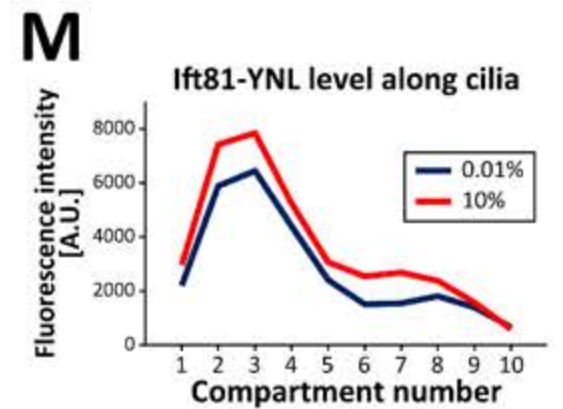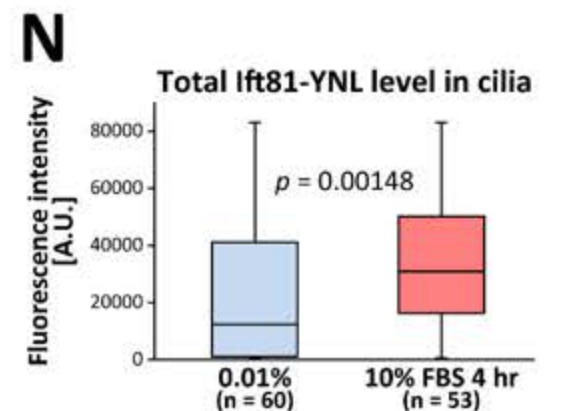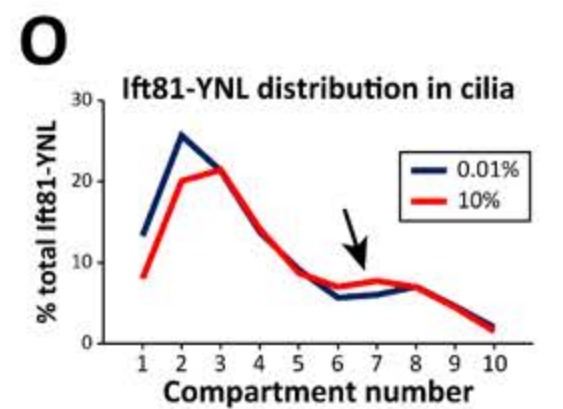

**A**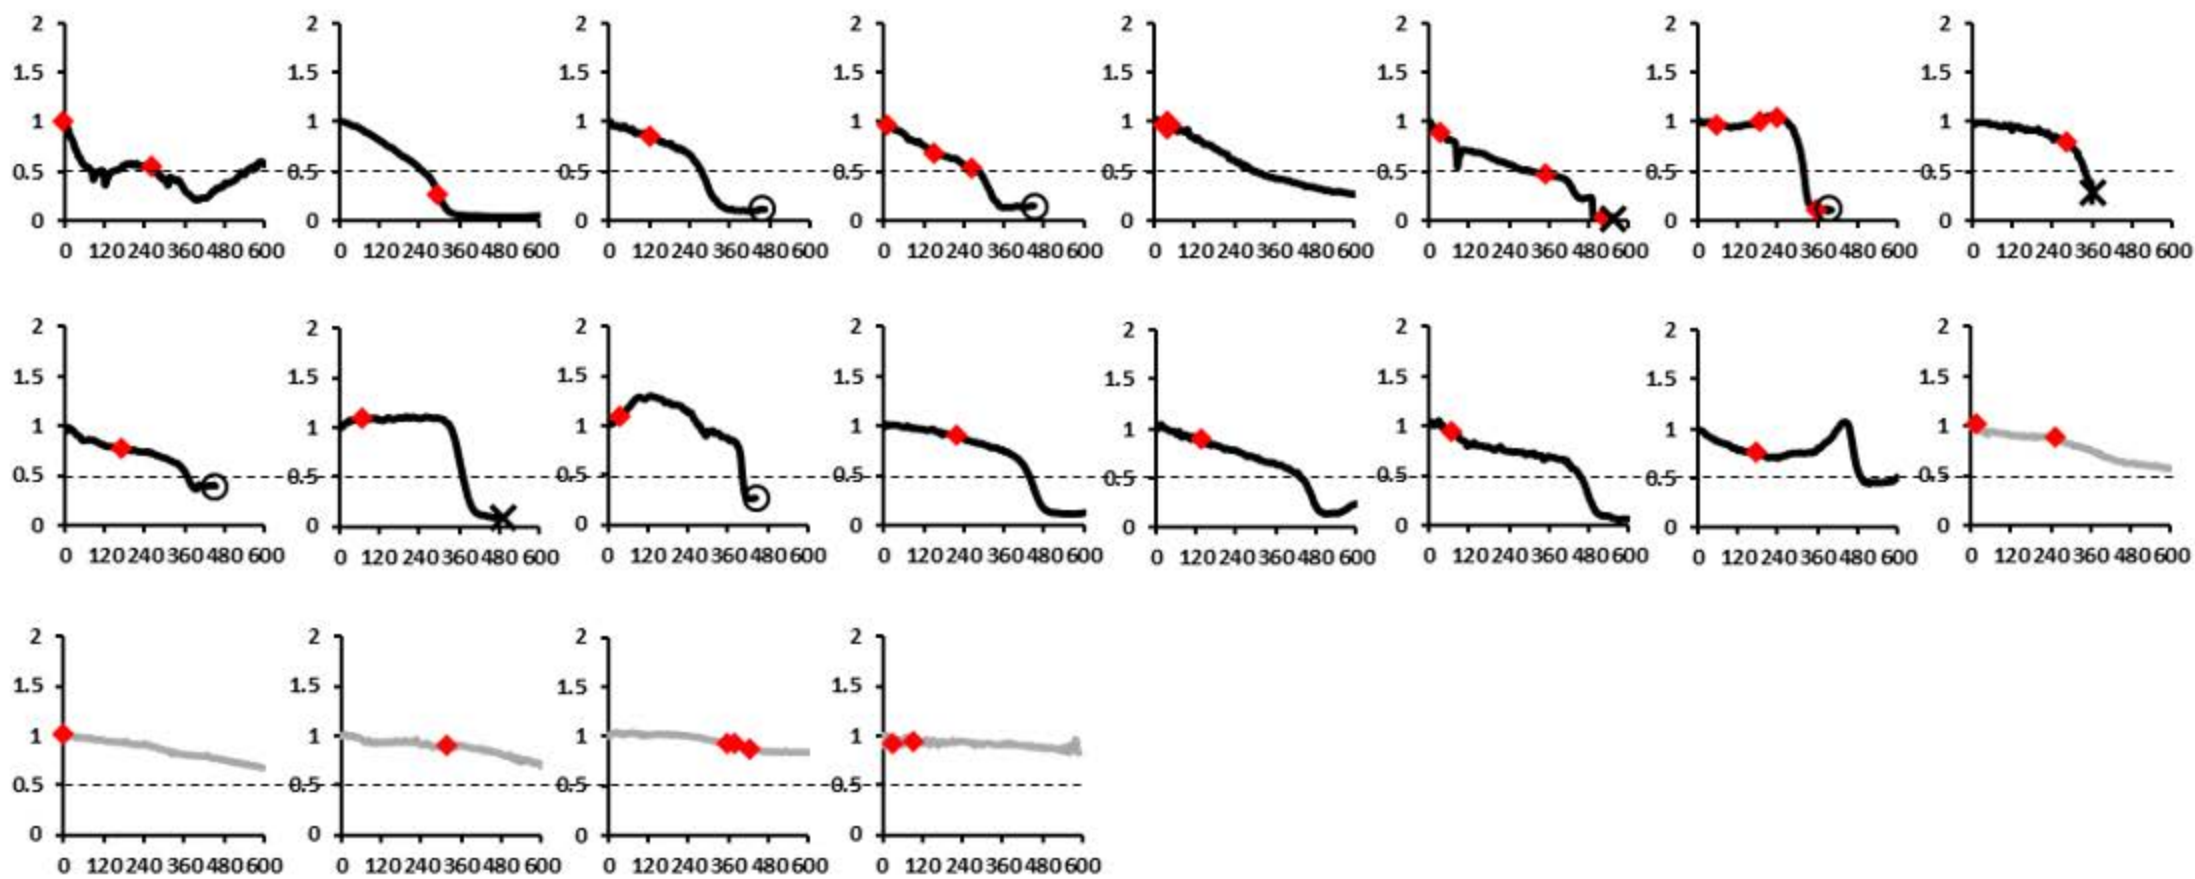**B**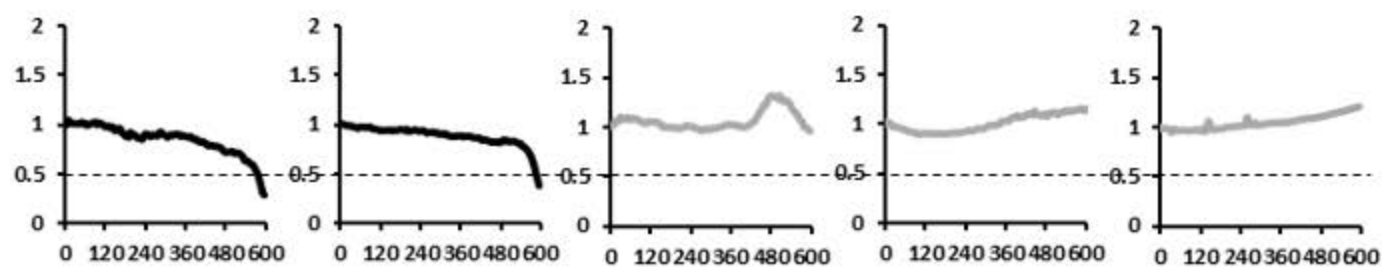**C**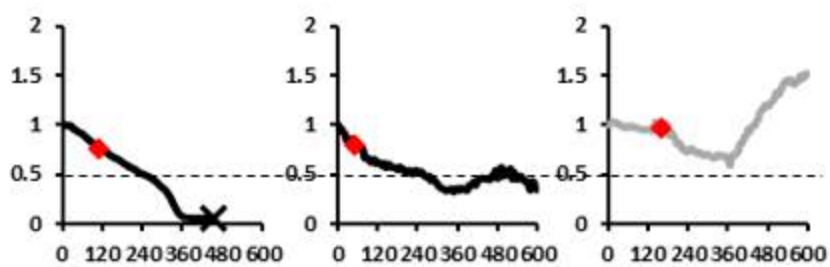**D**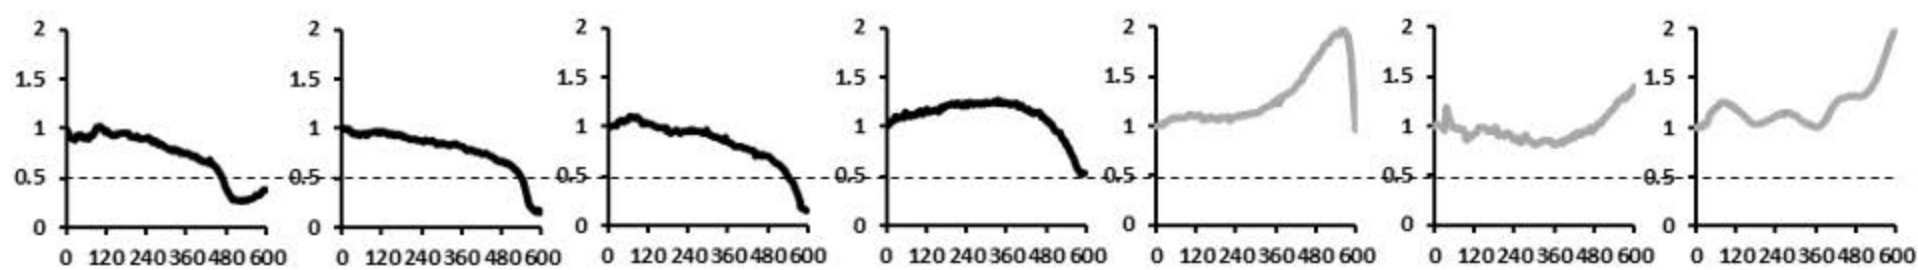



**Figure S1. Characterization of cilia decapitation and *Inpp5e*<sup>+/-</sup> and *Inpp5e*<sup>-/-</sup> MEF, Related to Figure 1**

- (A) Time-lapse images of a mIMCD-3 primary cilium expressing Arl13b-GFP at quiescent state (0% FBS). Blue arrows indicate membrane thinning prior to excision. Yellow arrowheads indicate excised cilium tip.
- (B) Representative confocal images of Arl13b and Ac-tub immunofluorescence in *Inpp5e*<sup>+/-</sup> MEF and *Inpp5e*<sup>-/-</sup> MEF at quiescent state. Nuclei labeled with DAPI.
- (C) Quantification of % ciliation in quiescent *Inpp5e*<sup>+/-</sup> and *Inpp5e*<sup>-/-</sup> MEF. A primary cilium is defined by positive labeling with Arl13b and Ac tub immunofluorescence. Data are represented as mean  $\pm$  SEM. A two-tailed Student's T-test was performed with *p* values indicated. (n=323, 374 cells; 3 experiments)
- (D) Quantification of Arl13b-labeled cilia lengths in quiescent *Inpp5e*<sup>+/-</sup> and *Inpp5e*<sup>-/-</sup> MEF. Data are represented as mean  $\pm$  SEM. A two-tailed Student's T-test was performed with *p* values indicated. (n=271, 353 cells; 3 experiments)
- (E) Confocal and SR-SIM images of Arl13b and Ac-tub immunofluorescence in *Inpp5e*<sup>+/-</sup> MEF and *Inpp5e*<sup>-/-</sup> MEF. Insets are magnified images of respective cilia. White arrowhead indicates bulged ciliary tip in *Inpp5e*<sup>-/-</sup> MEF.
- (F) Quantification of % cells displaying bulged ciliary tips as in (E). Data are represented as mean  $\pm$  SEM. A two-tailed Student's T-test was performed with *p* values indicated. (n=323, 374 cells; 3 experiments as in (B))
- (G) Quantification of % ciliation in *Inpp5e*<sup>+/-</sup> and *Inpp5e*<sup>-/-</sup> MEF at indicated time points post-stimulation with 10% FBS. Data are represented as mean  $\pm$  SEM. (n=271, 353 cells; 3 experiments)
- (H) Z-series of SR-SIM images of an Arl13b+ and Ac tub particle.

- (I) Representative Western blots of Arl13b,  $\alpha$ -tubulin and GAPDH proteins in collected cell lysates and pelleted conditioned culture media from mIMCD-3 cells treated with 0% or 10% FBS for 12 hours. Related to Figure 1H.
- (J) Quantification of respective band signal intensities in (I). Data were shown as mean  $\pm$  SEM. A two-tailed Student's T-test was performed with  $p$  values indicated. ( $n = 4$  experiments)
- (K) Representative time-lapse images of a ventral-positioned *Inpp5e*<sup>+/-</sup> MEF primary cilium passively breaking as a result of non-specific adhesion and immobilization to underlying substratum. Cell was expressed with 5HT<sub>6</sub>-YFP. Arrowheads indicate cilia tip. Red dotted line marks position of immobilization. See also Methods under "Quantitative image analyses".
- Time in min:sec in (A), hr:min in (K). Scale bars indicate 5  $\mu$ m in (A) and (K), 10 $\mu$ m in (E) left panel, 1 $\mu$ m in (E) right panel, 1 $\mu$ m in (H) left panel and 0.2  $\mu$ m in (H) right panel.

**Figure S2. AurA-dependent ciliary Inpp5e depletion re-organizes ciliary PI(4,5)P<sub>2</sub>, Related to Figure 2.**

- (A) Live fluorescence images of *Inpp5e*<sup>+/-</sup> MEF or *Inpp5e*<sup>-/-</sup> MEF expressing 5HT<sub>6</sub>-YFP, 5HT<sub>6</sub>-YFP-Inpp5e(WT) or 5HT<sub>6</sub>-YFP-Inpp5e(CD) with cytosolic mCeru3 respectively after 4 hours of 10% FBS stimulation or at quiescent state (0% FBS). White dashed lines delineate cells. White arrowheads indicate cell-associated YFP+ particles that were likely vesicles released from primary cilia.
- (B) Quantification of % cells with associated extracellular YFP+ particles under indicated conditions, as in (A). Color coding as in panel above. Data are represented as mean  $\pm$  SEM. Two-tailed Student's T-tests were performed with  $p$  values indicated. ( $n= 111, 73, 92, 94, 88, 74$  cells for respective data from left to right; 4 experiments)
- (C) Quantification of % ciliation in *Inpp5e*<sup>+/-</sup> MEF expressing 5HT<sub>6</sub>-YFP, 5HT<sub>6</sub>-YFP-Inpp5e(WT) or 5HT<sub>6</sub>-YFP-Inpp5e(CD) with cytosolic mCeru3 at 0 hour and 6 hours of 10% FBS stimulation. Color coding as in panel above. Data are represented as mean  $\pm$  SEM. Two-tailed Student's T-tests were performed with respect to each 5HT<sub>6</sub>-YFP condition,  $p$  values indicated. ( $n=88, 54, 49, 66, 35, 44$  cells for respective data from left to right; 2 experiments)
- (D) Quantification of % ciliation in *Inpp5e*<sup>-/-</sup> MEF expressing 5HT<sub>6</sub>-YFP (control), 5HT<sub>6</sub>-YFP-Inpp5e(WT) or 5HT<sub>6</sub>-YFP-Inpp5e(CD) with cytosolic mCeru3 at 0 hour and 6 hours of 10% FBS stimulation. Color coding as in panel above. Data are represented as mean  $\pm$  SEM. Two-tailed Student's T-tests were performed with respect to each 5HT<sub>6</sub>-YFP condition,  $p$  values indicated. ( $n=94, 49, 57, 100, 55, 70$  cells for respective data from left to right; 3 experiments)
- (E) Ac tub and Inpp5e immunofluorescence of *Inpp5e*<sup>+/-</sup> MEF treated with 0% FBS, 10% FBS, 10% FBS +200nM Alisertib (Ast), or 10% FBS + 2 $\mu$ M Tubacin (Tub) for 4 hours. Images within Ac tub



and *Inpp5e* image panels are scaled to same intensity range, while Ac tub signals are adjusted in Merge to visualize axoneme. Arrowheads indicate cilia.

- (F) Signal intensity measurements of *Inpp5e* immunofluorescence in primary cilia (cilia - vicinity background) under indicated conditions, as in (E). Color coding as in panel on the right. Data are represented as mean  $\pm$  SEM. A two-tailed Student's T-test was performed with *p* values indicated. (n= 190, 169, 173, 106 cells for respective data from left to right; 3 experiments)
- (G) Quantification of % cells with associated extracellular YFP+ particles in *Inpp5e*<sup>+/-</sup> MEF and *Inpp5e*<sup>-/-</sup> MEF expressing 5HT<sub>6</sub>-YFP with cytosolic mCeru3 after 4 hours in 0% FBS, 10% FBS, 10% FBS + 200nM Ast, or 10% FBS + 2 $\mu$ M Tub. Color coding as in panel on the right. Data are represented as mean  $\pm$  SEM. A two-tailed Student's T-test was performed with *p* values indicated. (n= 124, 131, 112, 121, 48, 54, 47, 37 cells for respective data from left to right; 2-3 experiments)
- (H-I) Time-lapse measurements of ciliary PH(PLC $\delta$ ) accumulation in *Inpp5e*<sup>+/-</sup> MEF at (H) quiescent state (as shown in Figure 2D) or (I) growth-stimulated state (as shown in Figure 2F). Horizontal axes indicate time(min); vertical axes indicate ciliary PH(PLC $\delta$ ) accumulation expressed as a ratio of cilium length. Color coding as used in Figure 2G. Dotted line divide proximal half (0-0.5) and distal half (0.5-1.0) of cilium. "X" indicates end of imaging period. Data for (I) were between 2hrs and 4hrs, or 4hrs and 6hrs post-stimulation with 10% FBS.
- (J) An example of growth-stimulated primary cilia exhibiting PI(4,5)P<sub>2</sub> oscillation post-decapitation. White arrowheads indicate ciliary PH(PLC $\delta$ ).
- (K) Time-lapse measurements of PH(PLC $\delta$ ) accumulation in cilium in (C), expressed as relative ratio of cilium length. Red diamond marks time point of decapitation. Time in hr:min. Scale bars indicate 5 $\mu$ m.

**Figure S3. PI(4,5)P<sub>2</sub> regulates ciliary localization of F-actin, actin regulatory proteins and small GTPases, Related to Figure 3.**

- (A) SR-SIM images of Arl13b, Ac tub and phalloidin immunofluorescence in normal and bulged cilia of *Inpp5e*<sup>-/-</sup> MEF. Rightmost panel are IMARIS 3D reconstructions of "Merge" images. Arrowhead indicates ciliary phalloidin signals.
- (B) Live fluorescence images of NIH/3T3 expressing 5HT<sub>6</sub>-mCeru3-PIPK or 5HT<sub>6</sub>-mCeru3-PIPK(KD) and respective YFP-tagged F-actin sensor (F-tractin) or actin regulatory proteins. White arrowheads indicate ciliary localization of respective proteins. Cofilin-1 was generally observed to accumulate at ciliary tip, while fascin was detected along ciliary length.
- (C) Relative risk ratio analyses on the effect of differential ciliary PI(4,5)P<sub>2</sub> in influencing intraciliary F-actin or actin regulatory protein incidence, for corresponding horizontal image rows in (A).
- (D) Live fluorescence images of *Inpp5e*<sup>+/-</sup> and *Inpp5e*<sup>-/-</sup> MEF expressing 5HT<sub>6</sub>-mCeru3 and cofilin-1-YFP. White arrowhead indicates tip accumulation of cofilin-1.

- (E) Relative risk ratio analyses on the effect of differential ciliary PI(4,5)P<sub>2</sub> in influencing intraciliary cofilin-1 incidence, as in (C).
- (F) Live fluorescence images of NIH/3T3 expressing 5HT<sub>6</sub>-mCeru3-PIPK or 5HT<sub>6</sub>-mCeru3-PIPK(KD) and respective YFP-tagged (top) phosphoinositide-binding Kras small GTPase, (middle) Kras tail anchor harboring phosphoinositide-binding module, or (bottom) non-phosphoinositide-binding Hras small GTPase. White arrowheads indicate ciliary localization. While Kras was restricted to the proximal cilia in 5HT<sub>6</sub>-FP-PIPK(KD)-expressing cells, 5HT<sub>6</sub>-FP-PIPK expression was sufficient to accumulate Kras into distal cilia. In contrast, Hras accumulated to distal cilia regardless of ciliary PI(4,5)P<sub>2</sub>.
- (G) Quantification of small GTPase or tail anchor accumulation in cilia, expressed as a relative ratio of cilium length. Data are represented as mean ± SEM. Two-tailed Student's T-tests were performed with respect to each PIPK (KD) condition, *p* values indicated. (n=12, 20, 71, 84, 25, 24 cells; 2-3 experiments)

Scale bars indicate 1 μm in (A) and 5 μm in (B), (D) and (G).

**Figure S4. F-actin and SNX9 localize in primary cilia prior to decapitation, Related to Figure 3.**

- (A) Correlation plot of intraciliary F-actin position with excision position, each expressed as relative ratio of cilia length. Color coding as in panel above. Position of F-actin was measured at estimated centroid position of F-actin foci prior to excision. In each case, linear regression is drawn in dashed line, with Pearson correlation coefficient *R* value indicated. (n=7, 8, 6 cells from left to right; 2-3 experiments from (D) and (E))
- (B) Quantification of actin foci longitudinal length just prior to excision. Color coding as in panel above. Data shown as mean ± SEM. Student's T-tests were performed with respect to *Inpp5e*<sup>-/-</sup> 10% FBS condition, *p* values indicated. (n= 7, 8, 6 cells from left to right; 2-3 experiments from (D) and (E))
- (C) Quantification of relative position of cilia excision and F-actin. Color coding as in panel above. Data shown as mean ± SEM. Student's T-test was performed with *p* value indicated. (n= 7, 8, 6 cells from left to right; 2-3 experiments from (D) and (E))
- (D) Percentage of cilia decapitation events with or without co-observed intraciliary F-actin in *Inpp5e*<sup>+/-</sup> MEF expressing 5HT<sub>6</sub>-YFP and mCeru3-Lifeact between 0-2, 2-4 and 4-6 hours of 10% FBS stimulation, related to Figure 3C. Of note, the transient nature of intraciliary F-actin could render inefficient capturing by the two-minute experimental imaging intervals, and a high F-actin marker intensity in the cell body could also limit visualization of specific signals in primary cilia; also applies to (E-G). Color coding as in panel above. (n=6, 5, 4 cells; 2-3 experiments (D) and (E))
- (E) Percentage of cilia decapitation events with or without co-observed intraciliary F-actin in *Inpp5e*<sup>-/-</sup> MEF 5HT<sub>6</sub>-YFP and mCeru3-Lifeact between 0 and 2 hours in 0% FBS, or between 0-2, 2-4 and



4-6 hours of 10% FBS stimulation, related to Figure 3D. Color coding as in panel above. (n=13, 5, 5, 7 cells; 2-3 experiments)

- (F) Percentage of cilia decapitation events with or without co-observed intraciliary F-actin in *Inpp5e*<sup>+/-</sup> MEF expressing 5HT<sub>6</sub>-mCerule3 and alternative F-actin sensor, F-tractin-Citrine, at respective time periods of 10% FBS stimulation, see (H) below. Color coding as in panel above. (n=2, 4, 2 cells; 2 experiments)
- (G) Percentage of cilia decapitation events with or without co-observed intraciliary F-actin in *Inpp5e*<sup>+/-</sup> MEF expressing Lifeact-mCerule3 and alternative ciliary membrane marker, Arl13b-YFP, at respective time periods of 10% FBS stimulation, see (I) below. Color coding as in panel above. (n=4, 4, 4 cells; 2 experiments)
- (H) Time-lapse images of *Inpp5e*<sup>+/-</sup> MEF expressing 5HT<sub>6</sub>-mCerule3 and F-tractin-citrine between 0hrs and 2hrs post-stimulation with 10% FBS, as in (F). White arrowheads indicate F-actin assembly at site of cilia excision.
- (I) Time-lapse images of *Inpp5e*<sup>+/-</sup> MEF expressing Arl13b-YFP and Lifeact-mCerule3 between 4hrs and 6hrs post-stimulation with 10% FBS, as in (G). White arrowheads indicate F-actin assembly at site of cilia excision.
- (J) Time-lapse images of *Inpp5e*<sup>+/-</sup> MEF expressing 5HT<sub>6</sub>-mCerule3 and YFP-SNX9 between 4hrs and 6hrs post-stimulation with 10% FBS. Arrowheads indicate SNX9 propagation from proximal cilia to distal site of cilia excision.
- (K) Correlation plot of SNX9 intraciliary position with position of excision, each expressed as relative ratio of cilia length. Position of SNX9 was measured at estimated centroid position of SNX9 foci just prior to excision. Linear regression is drawn in dashed line with Pearson correlation coefficient R value indicated. (n=23 cells; 2 experiments)

Time in hr:min. Scale bars indicate 5µm.

**Figure S5. Experimental scheme for ciliary vesicle proteomic profiling and analyses of ciliary IFT distribution, Related to Figure 4.**

- (A) Generation of *Ift88*KO mIMCD-3 cell line using CRISPR/CAS9-based genome editing technique. The target sequence of guide-RNA (gRNA) used was placed on the minus strand of the genome corresponding to the exon 3 of *Ift88*. Generated *Ift88*KO mIMCD-3 cell line had bi-allelic frameshift insertion at the CAS9-cleaved site.
- (B) Loss of *Ift88* expression was verified using Western blot analysis with an anti-*Ift88* antibody.
- (C) Ac tub immunofluorescence revealed that *Ift88*KO mIMCD-3 cells lack primary cilia.
- (D) Schematic illustrating the collection and processing of conditioned culture media under indicated conditions. Culture media were first pelleted at low centrifugal force to remove large cell debris, followed by higher centrifugal forces to concentrate smaller ciliary vesicles and exosomes.

- (E) Representative SDS-PAGE of 100k xg pelleted conditioned media under conditions illustrated in (D), as visualized by SyproRuby staining.
- (F) Actub/ $\gamma$ tub and *Ift81*/*Ift140* immunofluorescence of *Inpp5e*<sup>+/-</sup> and *Inpp5e*<sup>-/-</sup> MEF treated with 0% FBS or 10% FBS for 4 hours. Images within Ac tub/ $\gamma$ tub and *Ift81*/*Ift140* image panels in each column group are scaled to same intensity range. Brackets indicate axoneme, while arrows mark centrioles.
- (G) Signal intensity measurements of *Ift81* or *Ift140* immunofluorescence in primary cilia (cilia - vicinity background) under indicated conditions, as in (F). Data are represented as mean  $\pm$  SEM. Two-tailed Student's T-tests were performed with respect to each 0% FBS condition, *p* values indicated. (n= 114, 118, 90, 88, 14, 113, 87, 79 cells for respective data from left to right; 3 experiments)
- (H) Schematic illustration of yellow Nano-lantern (YNL) knock-in into 3'-end of *Ift81* to generate *Ift81*:YNL knock-in mIMCD-3 cell line.
- (I) *Ift81*-YNL co-localizes with *Arl13b* immunofluorescence in *Ift81*:YNL knock-in mIMCD-3 cell line.
- (J) Western blot detection of YNL-tagged endogenous *Ift81* (arrowhead) using anti-GFP polyclonal antibody in total cell lysates or particle-enriched 100k-g culture media pellets of WT or *Ift81*:YNL knock-in mIMCD-3 after a 24-hour stimulation with either 0.1% FBS or 10% FBS.
- (K) Fluorescence images of *Ift81*-YNL with *Arl13b* and  $\gamma$ tub immunofluorescence upon 4-hour 0.01% FBS or 10% FBS stimulation of *Ift81*:YNL knock-in mIMCD-3.
- (L) Schematic illustration of cilia length compartmentalization used for ciliary *Ift81* analyses in (M)-(O). For each primary cilium, YNL fluorescence intensities along cilia length was first obtained using a line scan spanning from base to tip of cilium (middle), and total fluorescence intensity within each compartment was derived via signal integration (bottom).
- (M) Quantification of mean *Ift81*-YNL fluorescence intensities along cilia length of primary cilia subjected to 4-hour stimulation with 0.01% FBS or 10% FBS. (n = 60 for 0.01% FBS; n = 53 for 10% FBS)
- (N) Quantification of total *Ift81*-YNL fluorescence signals of primary cilia subjected to 4-hour stimulation of either 0.01% FBS or 10% FBS. Total *Ift81*-YNL level in each cilium was calculated via integration of fluorescence signals across all compartments described in (L). Data are shown as median  $\pm$  quartile (box) and 90 percentile (bars). Mann-Whitney U-test was performed with *p* values indicated. (n = 60 for 0.01% FBS; n = 53 for 10% FBS)
- (O) Quantification of mean *Ift81*-YNL fluorescence signal distribution along cilia length, expressed as a percentage of total *Ift81*-YNL fluorescence signals as in (N).
- Scale bars indicate 10 $\mu$ m in (C), 2  $\mu$ m in (F), 5 $\mu$ m in (I) and 1  $\mu$ m in (K).

**Figure S6. Time-lapse measurements of nuclear Venus-p27K/mCherry-hCdt1(30/120) signal intensity ratios under growth stimulation, Related to Figure 6.**



Time-lapse measurements of nuclear Venus-p27K<sup>-</sup>/mCherry-hCdt1(30/120) signal intensity ratios in:

(A) Decap<sup>+</sup> *Inpp5e*<sup>+/-</sup> MEF expressing 5HT<sub>6</sub>-mCeru3;

(B) Decap<sup>-</sup> *Inpp5e*<sup>+/-</sup> MEF expressing 5HT<sub>6</sub>-mCeru3;

(C) Decap<sup>+</sup> *Inpp5e*<sup>+/-</sup> MEF expressing 5HT<sub>6</sub>-mCeru3-Tβ4(WT);

(A) Decap<sup>-</sup> *Inpp5e*<sup>+/-</sup> MEF expressing 5HT<sub>6</sub>-mCeru3-Tβ4(WT).

Horizontal axes indicate time (min); vertical axes indicate basal normalized ratios of Venus-p27K<sup>-</sup>/mCherry-hCdt1. Black dashed lines indicate arbitrary G<sub>0</sub>-G<sub>1</sub> transit mid-point. Red diamonds mark time points of cilia decapitation events. Open circles indicate beginning of mCherry-hCdt1(30/120) signal decrease (signifying start of S-phase transit). Crosses indicate end of imaging period. Responses plotted in grey were cells which maintained ratio values >0.5 throughout the 10-hour imaging period (these cells did not demonstrate a sharp decrease in Venus-p27K<sup>-</sup> i.e. not determined for quiescence exit), and were excluded from time measurements in Figure 6E.
