# Supplementary material
Source: PubMed Central journal article supplement (PMC5660509)
Supplement: NIHMS875013-supplement-Table_S3.pdf [file NIHMS875013-supplement-Table_S3.pdf]

**Table S3. Primers used in this study**

| Sequence-Based Reagents                                                                                                                                                  |           |            |
|--------------------------------------------------------------------------------------------------------------------------------------------------------------------------|-----------|------------|
| REAGENT or RESOURCE                                                                                                                                                      | SOURCE    | IDENTIFIER |
| PCR primers for 5' EcoRI-Thymosin $\beta$ 4-BamHI 3': fwd: 5'-TTGG GAATTCGATGTCTGACAAACCCGAT-3'; rev: 5'-CCAAGGATCCCGATTCGCCAGCTTGCTT-3'                                 | This work | N/A        |
| Site-directed mutagenesis primers for Thymosin $\beta$ 4 (KK18,19EE): 5'-TCGATAAGTCGAAGTTGGAGGAAACAGAAACGCAAGAG-3'; rev: 5'-CTCTTGCGTTTTCTGTTTC-CTCCAACCTTCGACTTATCGA-3' | This work | N/A        |
| Primers for 5' EcoRI-Inpp5e (cat. dom.; C641A)-BamHI 3': fwd: 5'-TTGGGAATTCGCGGATCTTGCAGACTACAAGCTC-3'; rev: 5'-AACCGGATCCTCAAGAAACGGAGGCGATGGTGC-3'                     | This work | N/A        |
| Site-directed mutagenesis primers for Inpp5e (cat. dom.; C641A; D477N): 5'-AGGTGTTCTGGTTTGGAACTTCAACTTCCGCCTGAG-3'; rev: 5'-CTCAGGCGGAAGTTGAAGTTTCCAAACCGAACA CCT-3'     | This work | N/A        |
| Primers for amplifying the left arm of lft81: fwd: 5'-GTGCTGTCAGTCCAATCTGCC-3'; rev: 5'-CCTTGCTCACGAGAACCAGCCTGTCTTCTCCGCC CTCTTG-3'                                     | This work | N/A        |
| Primers for amplifying the right arm of lft81: fwd: 5'-AGAGTGCTGAAGAACGAGCAGTGAGCCCTGTGT CGGCCG-3'; rev: 5'-ATCCTGTGTTAGCTTCCAGCCT-3'                                    | This work | N/A        |
| Primers for amplifying YNL: fwd: 5'-GCTGGTTCTCGTGAGCAAGGGCGAGGAGCT-3'; rev: 5'-CTGCTCGTTCTTCAGCACTCT-3'                                                                  | This work | N/A        |
| Primers for lft81:YNL genotyping; fwd: 5'-CAGTTGGCAGTTAAGAAACGGAG-3'; rev: 5'-GTAGTCCACATGGAACAGAGGC-3'                                                                  | This work | N/A        |
